# Supplementary material for: Peelable Nanocomposite Coatings: “Eco-Friendly” Tools for the Safe Removal of Radiopharmaceutical Spills or Accidental Contamination of Surfaces in General-Purpose Radioisotope Laboratories
Source: MDPI journal article supplement (doi:10.3390/pharmaceutics14112360), 2022-11-01
Supplement: s1 [file s1]

Supporting information

# Peelable Nanocomposite Coatings: “Eco-Friendly” Tools for the Safe Removal of Radiopharmaceutical Spills or Accidental Contamination of Surfaces in General-Purpose Radioisotope Laboratories

Traian Rotariu <sup>1,†</sup>, Daniela Pulpea <sup>1,†</sup>, Gabriela Toader <sup>1,\*</sup>, Edina Rusen <sup>2,\*</sup>, Aurel Diacon <sup>1,2</sup>, Valentina Neculae <sup>3</sup> and John Liggat <sup>4</sup>

<sup>1</sup> Military Technical Academy “Ferdinand I”, 39-49 George Cosbuc Boulevard, 050141 Bucharest, Romania

<sup>2</sup> Faculty of Chemical Engineering and Biotechnologies, University ‘POLITEHNICA’ of Bucharest, 1-7 Gh. Polizu Street, 011061 Bucharest, Romania

<sup>3</sup> Institute for Nuclear Research—RATEN ICN-Pitesti, 1 Street Campului, 115400 Mioveni, Romania

<sup>4</sup> Department of Pure and Applied Chemistry, University of Strathclyde, 295 Cathedral Street, Glasgow G1 1BX, UK

\* Correspondence: nitagabriela.t@gmail.com (G.T.); edina\_rusen@yahoo.com (E.R.)

† These authors contributed equally to this work.

## Contents

|                                                                                                                                                                                                        |   |
|--------------------------------------------------------------------------------------------------------------------------------------------------------------------------------------------------------|---|
| <b>Figure S1.</b> Common types of surfaces in radioisotope laboratories, employed for decontamination assay: concrete (C), painted metal (PM), ceramic tiles (CT), linoleum (L), epoxy resin (P) ..... | 2 |
| <b>Figure S2.</b> Illustration of specimens contaminated with <sup>90</sup> Sr- <sup>90</sup> Y and <sup>241</sup> Am. ....                                                                            | 2 |
| <b>Figure S3.</b> (a) Exemplification of contaminated specimens covered with one of the decontamination formulations; (b, c) Peeling the nanocomposite film from the decontaminated surface.....       | 2 |
| <b>Figure S4.</b> Recording the activity of the tested specimens.....                                                                                                                                  | 3 |
| <b>Figure S5.</b> DSC curves obtained for the nanocomposite films.....                                                                                                                                 | 3 |
| <b>Table S1.</b> Decontamination efficacies obtained for Americium-241.....                                                                                                                            | 4 |
| <b>Table S2.</b> Decontamination efficacies obtained for Strontium-90 .....                                                                                                                            | 5 |
| <b>Figure S6.</b> Hypothetical illustrations of the interactions established between the contaminants and the complexing agents from the decontaminating solutions.....                                | 6 |

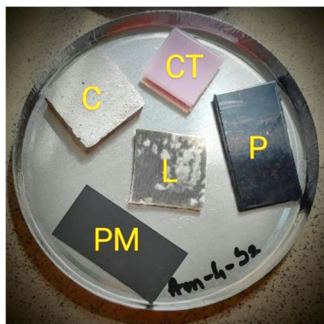

**Figure S1.** Common types of surfaces in radioisotope laboratories, employed for decontamination assay: concrete (C), painted metal (PM), ceramic tiles (CT), linoleum (L), epoxy resin (P).

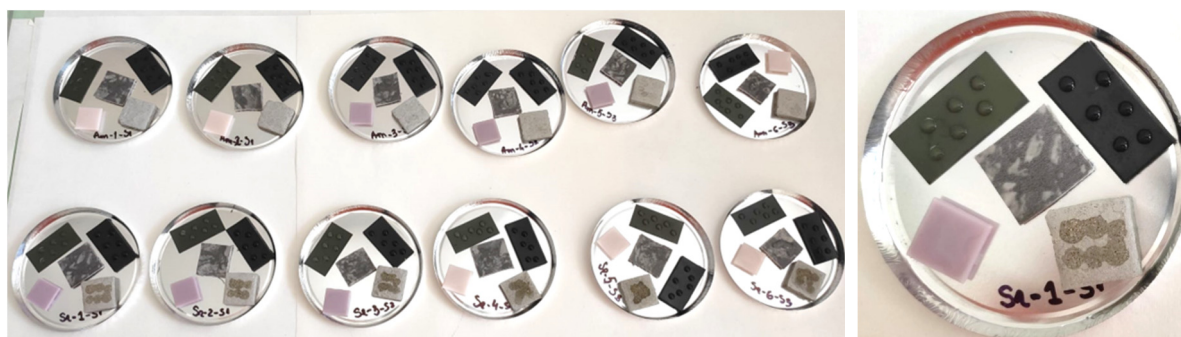

**Figure S2.** Illustration of specimens contaminated with  $^{90}\text{Sr}$ - $^{90}\text{Y}$  and  $^{241}\text{Am}$ .

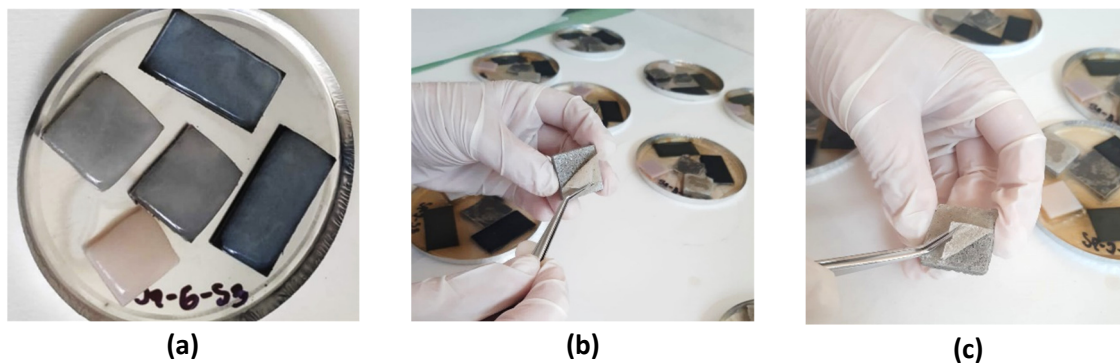

**Figure S3.** (a) Exemplification of contaminated specimens covered with one of the decontamination formulations; (b, c) Peeling the nanocomposite film from the decontaminated surface.

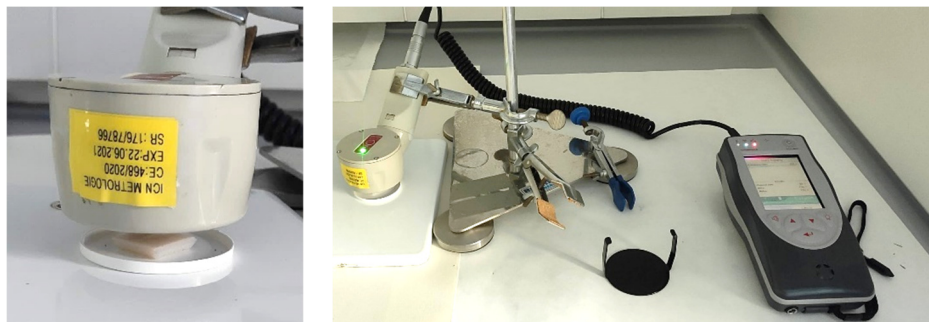

**Figure S4.** Recording the activity of the tested specimens.

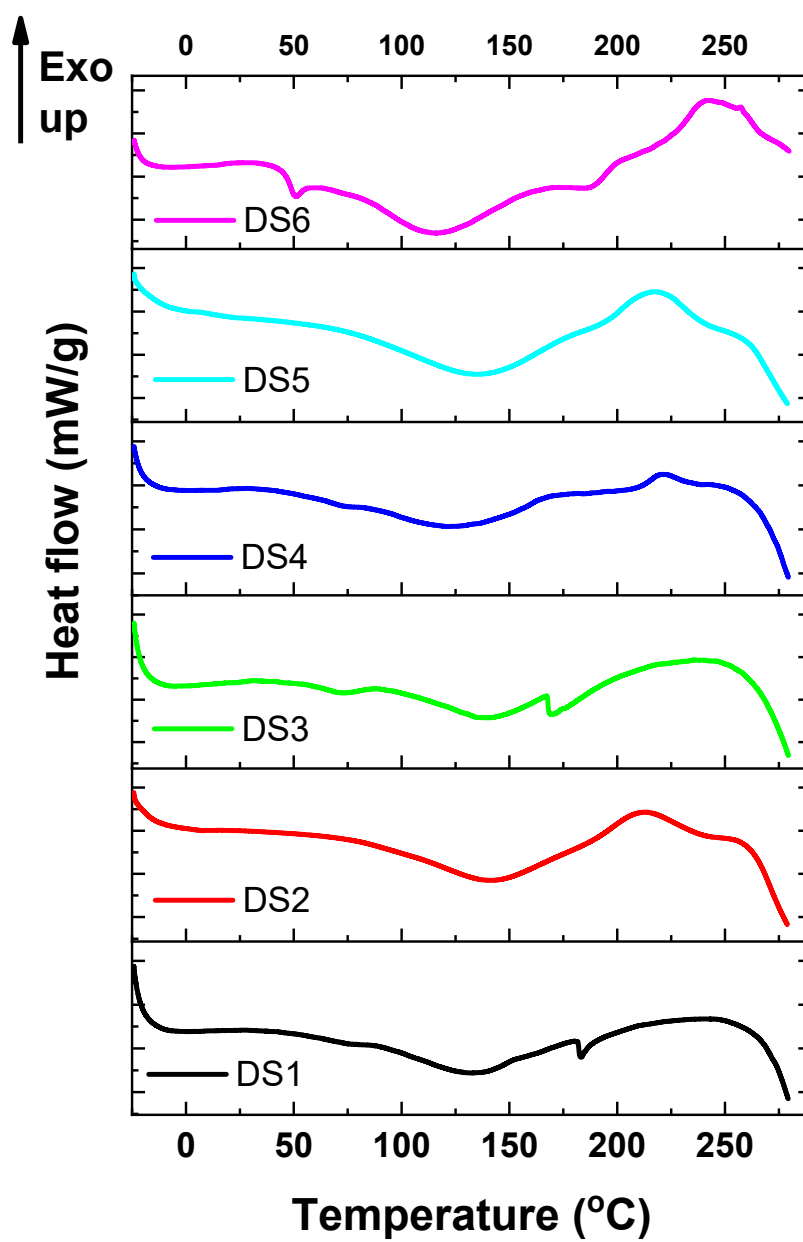

**Figure S5.** DSC curves obtained for the nanocomposite films.

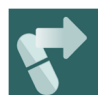

**Table S1.** Decontamination efficacies obtained for Americium-241.

| Table S1. Decontamination efficacies obtained for Americium-241. |          |       |       |          |       |       |          |       |       |          |       |       |          |       |       |  |  |
|------------------------------------------------------------------|----------|-------|-------|----------|-------|-------|----------|-------|-------|----------|-------|-------|----------|-------|-------|--|--|
| Decontamination solution                                         |          |       |       | DS-1     |       |       |          |       |       |          |       |       |          |       |       |  |  |
| Surfaces                                                         |          | PM    |       |          | L     |       |          | CT    |       |          | C     |       |          | P     |       |  |  |
|                                                                  | Activity |       | DE    |  |  |
|                                                                  | Before   | After |       | Before   | After |       | Before   | After |       | Before   | After |       | Before   | After |       |  |  |
|                                                                  | 1810     | 219   | 87.90 | 1380     | 201   | 85.43 | 1830     | 208   | 88.63 | 1075     | 316   | 70.60 | 1550     | 192   | 87.61 |  |  |
|                                                                  | 1490     | 232   | 84.43 | 1850     | 183   | 90.11 | 1660     | 213   | 87.17 | 1210     | 284   | 76.53 | 1650     | 192   | 88.36 |  |  |
|                                                                  | 1643     | 201   | 87.77 | 1809     | 182   | 89.94 | 1570     | 203   | 87.07 | 1003     | 286   | 71.49 | 1862     | 207   | 88.88 |  |  |
| Decontamination efficacy                                         |          |       | 86.70 |          |       | 88.49 |          |       | 87.62 |          |       | 72.87 |          |       | 88.29 |  |  |
| Standard deviation                                               |          |       | 1.61  |          |       | 2.16  |          |       | 0.72  |          |       | 2.61  |          |       | 0.52  |  |  |
| Decontamination solutions                                        |          |       |       | DS-2     |       |       |          |       |       |          |       |       |          |       |       |  |  |
| Surfaces                                                         |          | PM    |       |          | L     |       |          | CT    |       |          | C     |       |          | P     |       |  |  |
|                                                                  | Activity |       | DE    |  |  |
|                                                                  | Before   | After |       | Before   | After |       | Before   | After |       | Before   | After |       | Before   | After |       |  |  |
|                                                                  | 1450     | 224   | 84.55 | 2150     | 200   | 90.70 | 1730     | 181   | 89.54 | 1490     | 213   | 85.70 | 1950     | 197   | 89.90 |  |  |
|                                                                  | 1850     | 180   | 90.27 | 1810     | 180   | 90.06 | 1370     | 202   | 85.26 | 1430     | 237   | 83.43 | 1590     | 221   | 86.10 |  |  |
|                                                                  | 1970     | 211   | 89.29 | 1506     | 180   | 88.05 | 1690     | 178   | 89.47 | 1368     | 285   | 79.17 | 1590     | 160   | 89.94 |  |  |
| Decontamination efficacy                                         |          |       | 88.04 |          |       | 89.60 |          |       | 88.09 |          |       | 82.77 |          |       | 88.65 |  |  |
| Standard deviation                                               |          |       | 2.50  |          |       | 1.13  |          |       | 2.00  |          |       | 2.71  |          |       | 1.80  |  |  |
| Decontamination solutions                                        |          |       |       | DS-3     |       |       |          |       |       |          |       |       |          |       |       |  |  |
| Surfaces                                                         |          | PM    |       |          | L     |       |          | CT    |       |          | C     |       |          | P     |       |  |  |
|                                                                  | Activity |       | DE    |  |  |
|                                                                  | Before   | After |       | Before   | After |       | Before   | After |       | Before   | After |       | Before   | After |       |  |  |
|                                                                  | 1970     | 211   | 89.29 | 1506     | 180   | 88.05 | 1690     | 178   | 89.47 | 1468     | 225   | 84.67 | 1590     | 160   | 89.94 |  |  |
|                                                                  | 1920     | 206   | 89.27 | 1860     | 182   | 90.22 | 2090     | 202   | 90.33 | 1990     | 228   | 88.54 | 1740     | 159   | 90.86 |  |  |
|                                                                  | 2270     | 203   | 91.06 | 2107     | 203   | 90.37 | 2211     | 208   | 90.59 | 1920     | 209   | 89.11 | 2380     | 194   | 91.85 |  |  |
| Decontamination efficacy                                         |          |       | 89.87 |          |       | 89.54 |          |       | 90.13 |          |       | 87.44 |          |       | 90.88 |  |  |
| Standard deviation                                               |          |       | 0.84  |          |       | 1.06  |          |       | 0.48  |          |       | 1.97  |          |       | 0.78  |  |  |
| Decontamination solutions                                        |          |       |       | DS-5     |       |       |          |       |       |          |       |       |          |       |       |  |  |
| Surfaces                                                         |          | PM    |       |          | L     |       |          | CT    |       |          | C     |       |          | P     |       |  |  |
|                                                                  | Activity |       | DE    |  |  |
|                                                                  | Before   | After |       | Before   | After |       | Before   | After |       | Before   | After |       | Before   | After |       |  |  |
|                                                                  | 2130     | 250   | 88.26 | 2050     | 280   | 86.34 | 2100     | 276   | 86.86 | 1480     | 425   | 71.28 | 1670     | 203   | 87.84 |  |  |
|                                                                  | 1980     | 230   | 88.38 | 1770     | 204   | 88.47 | 1866     | 225   | 87.94 | 1800     | 670   | 62.78 | 2124     | 400   | 81.17 |  |  |
|                                                                  | 1770     | 180   | 89.83 | 1850     | 255   | 86.22 | 2080     | 287   | 86.20 | 1652     | 540   | 67.31 | 1890     | 347   | 81.64 |  |  |
| Decontamination efficacy                                         |          |       | 88.83 |          |       | 87.01 |          |       | 87.00 |          |       | 67.12 |          |       | 83.55 |  |  |
| Standard deviation                                               |          |       | 0.71  |          |       | 1.04  |          |       | 0.72  |          |       | 3.48  |          |       | 3.04  |  |  |
| Activity – [counts/second]; Decontamination efficacy – [%]       |          |       |       |          |       |       |          |       |       |          |       |       |          |       |       |  |  |

Activity – [counts/second]; Decontamination efficacy – [%]

**Table S2.** Decontamination efficacies obtained for Strontium-90.

| Table S2. Decontamination efficacies obtained for Strontium-90. |  |  |          |       |       |          |       |       |          |       |       |          |       |       |          |       |       |
|-----------------------------------------------------------------|--|--|----------|-------|-------|----------|-------|-------|----------|-------|-------|----------|-------|-------|----------|-------|-------|
| Decontamination solution                                        |  |  | DS-1     |       |       |          |       |       |          |       |       |          |       |       |          |       |       |
| Surfaces                                                        |  |  | PM       |       |       | L        |       |       | CT       |       |       | C        |       |       | P        |       |       |
|                                                                 |  |  | Activity |       |       | Activity |       |       | Activity |       |       | Activity |       |       | Activity |       |       |
|                                                                 |  |  | Before   | After | DE    |
|                                                                 |  |  | 5480     | 245   | 95.53 | 2290     | 480   | 79.04 | 5430     | 219   | 95.97 | 5420     | 2730  | 49.63 | 5222     | 403   | 92.28 |
|                                                                 |  |  | 5530     | 366   | 93.38 | 3390     | 597   | 82.39 | 5730     | 228   | 96.02 | 4770     | 2830  | 40.67 | 4740     | 256   | 94.60 |
|                                                                 |  |  | 5689     | 379   | 93.34 | 3750     | 734   | 80.43 | 5682     | 302   | 94.68 | 4900     | 2670  | 45.51 | 5170     | 460   | 91.10 |
| Decontamination efficacy                                        |  |  | 94.08    |       |       | 80.62    |       |       | 95.56    |       |       | 45.27    |       |       | 92.66    |       |       |
| Standard deviation                                              |  |  | 1.02     |       |       | 1.37     |       |       | 0.62     |       |       | 3.66     |       |       | 1.45     |       |       |
| Decontamination solutions                                       |  |  | DS-2     |       |       |          |       |       |          |       |       |          |       |       |          |       |       |
| Surfaces                                                        |  |  | PM       |       |       | L        |       |       | CT       |       |       | C        |       |       | P        |       |       |
|                                                                 |  |  | Activity |       |       | Activity |       |       | Activity |       |       | Activity |       |       | Activity |       |       |
|                                                                 |  |  | Before   | After | DE    |
|                                                                 |  |  | 6130     | 327   | 94.67 | 6120     | 360   | 94.12 | 6610     | 221   | 96.66 | 6370     | 3220  | 49.45 | 5320     | 222   | 95.83 |
|                                                                 |  |  | 6670     | 241   | 96.39 | 5070     | 383   | 92.45 | 6000     | 206   | 96.57 | 4550     | 2730  | 40.00 | 5800     | 203   | 96.50 |
|                                                                 |  |  | 6880     | 257   | 96.26 | 6590     | 430   | 93.47 | 6250     | 255   | 95.92 | 5860     | 3410  | 41.81 | 5540     | 460   | 91.70 |
| Decontamination efficacy                                        |  |  | 95.77    |       |       | 93.35    |       |       | 96.38    |       |       | 43.75    |       |       | 94.67    |       |       |
| Standard deviation                                              |  |  | 0.78     |       |       | 0.69     |       |       | 0.33     |       |       | 4.10     |       |       | 2.12     |       |       |
| Decontamination solutions                                       |  |  | DS-3     |       |       |          |       |       |          |       |       |          |       |       |          |       |       |
| Surfaces                                                        |  |  | PM       |       |       | L        |       |       | CT       |       |       | C        |       |       | P        |       |       |
|                                                                 |  |  | Activity |       |       | Activity |       |       | Activity |       |       | Activity |       |       | Activity |       |       |
|                                                                 |  |  | Before   | After | DE    |
|                                                                 |  |  | 6510     | 799   | 87.73 | 6150     | 476   | 92.26 | 6840     | 245   | 96.42 | 4950     | 2040  | 58.79 | 5680     | 317   | 94.42 |
|                                                                 |  |  | 6410     | 445   | 93.06 | 5980     | 480   | 91.97 | 7220     | 219   | 96.97 | 4790     | 2260  | 52.82 | 5810     | 403   | 93.06 |
|                                                                 |  |  | 6700     | 680   | 89.85 | 5860     | 502   | 91.43 | 6580     | 258   | 96.08 | 4560     | 1970  | 56.80 | 5760     | 520   | 90.97 |
| Decontamination efficacy                                        |  |  | 90.21    |       |       | 91.89    |       |       | 96.49    |       |       | 56.13    |       |       | 92.82    |       |       |
| Standard deviation                                              |  |  | 2.19     |       |       | 0.34     |       |       | 0.37     |       |       | 2.48     |       |       | 1.42     |       |       |
| Decontamination solutions                                       |  |  | DS-5     |       |       |          |       |       |          |       |       |          |       |       |          |       |       |
| Surfaces                                                        |  |  | PM       |       |       | L        |       |       | CT       |       |       | C        |       |       | P        |       |       |
|                                                                 |  |  | Activity |       |       | Activity |       |       | Activity |       |       | Activity |       |       | Activity |       |       |
|                                                                 |  |  | Before   | After | DE    |
|                                                                 |  |  | 6880     | 250   | 96.37 | 5940     | 220   | 96.30 | 6260     | 202   | 96.77 | 4800     | 2060  | 57.08 | 6220     | 305   | 95.10 |
|                                                                 |  |  | 6930     | 282   | 95.93 | 5600     | 320   | 94.29 | 5745     | 202   | 96.48 | 4780     | 2550  | 46.65 | 6630     | 240   | 96.38 |
|                                                                 |  |  | 5990     | 208   | 96.53 | 6350     | 280   | 95.59 | 5790     | 245   | 95.77 | 4390     | 2360  | 46.24 | 5620     | 330   | 94.13 |
| Decontamination efficacy                                        |  |  | 96.27    |       |       | 95.39    |       |       | 96.34    |       |       | 49.99    |       |       | 95.20    |       |       |
| Standard deviation                                              |  |  | 0.25     |       |       | 0.83     |       |       | 0.42     |       |       | 5.02     |       |       | 0.92     |       |       |
| Activity – [counts/second]; Decontamination efficacy – [%]      |  |  |          |       |       |          |       |       |          |       |       |          |       |       |          |       |       |

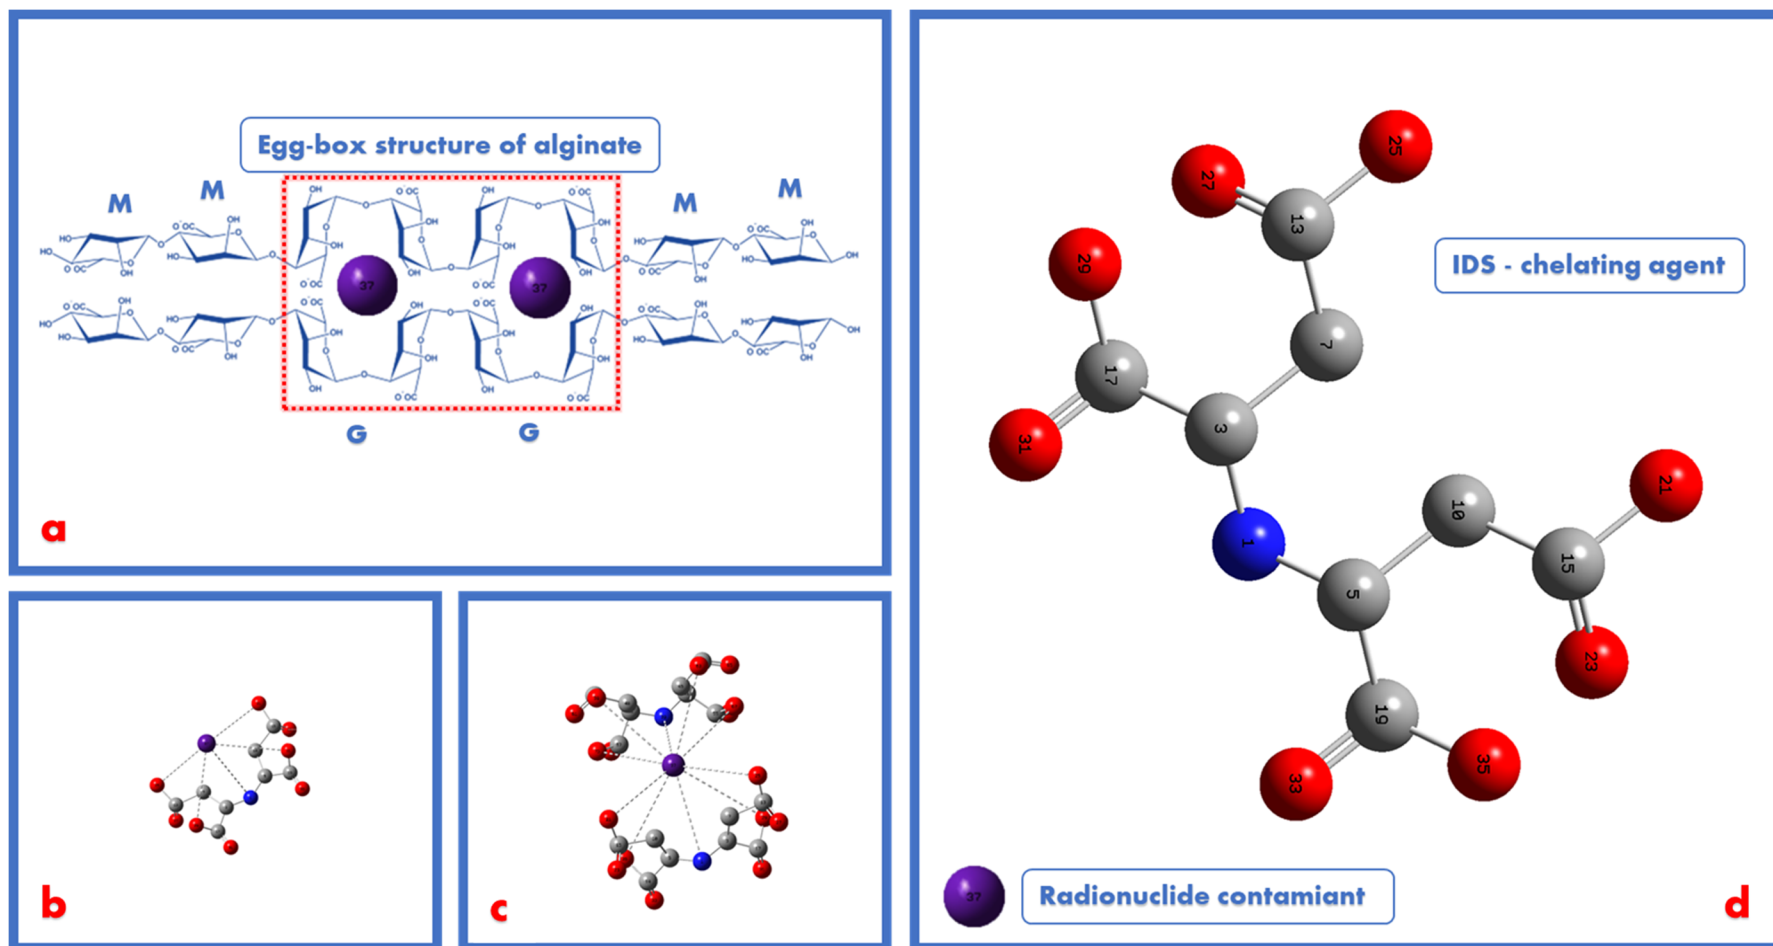

**Figure S6.** (a–d) Hypothetical illustrations of the interactions established between the contaminants and the complexing agents from the decontaminating solutions.
